# Supplementary material for: Polypyrrole nanoparticles-based soft actuator for artificial muscle applications
Source: Royal Society of Chemistry journal article supplement (doi:10.1039/c9ra06900c), 2019-01-01
Supplement: c9ra06900c1.pdf [file c9ra06900c1.pdf]

## Polypyrrole nanoparticles-based soft actuator for artificial muscle applications

Ajaha Khan<sup>a</sup>, Khalid A. Alamry<sup>\*a</sup>, Ravi Kant Jain<sup>b</sup>

<sup>a</sup>Faculty of Science, Department of Chemistry, King Abdulaziz University, Jeddah 21589, Saudi Arabia

<sup>b</sup>Microrobotics Laboratory/Information Technology Group, CSIR- Central Mechanical Engineering Research Institute (CMERI), Durgapur 713209, India

**Email: [kaalamri@kau.edu.sa](mailto:kaalamri@kau.edu.sa), [arkhan.029@gmail.com](mailto:arkhan.029@gmail.com)**

### Supplementary Information

#### S.1 TEM

For acquiring further information about the internal structure of the fabricated soft actuator, TEM analysis was conducted and shown in Supplementary Fig. S1 (a-c). Supplementary Fig. S1 (a-c) clearly showed that PPy nanoparticles of 4.03-7.0 nm were uniformly rooted and has intimate contact with PVA matrices. As shown in Supplementary Fig. S1 (d), after deposition of PEDOT: PSS/SWNT/IL electrode film on the surface of PPy/PVA/EL based electrolyte membrane, the PEDOT: PSS and SWNT were stacked together to form a composite structure. It can be clearly seen that the electrode materials homogeneously intimate and covered the grey background of PPy/PVA/EL matrices of the fabricated soft actuator (Supplementary Fig. S1 (d)). The TEM analysis reveals the uniform distribution and intimate contact of the SWNT and PEDOT: PSS with PPy/PVA/EL polymer composite.

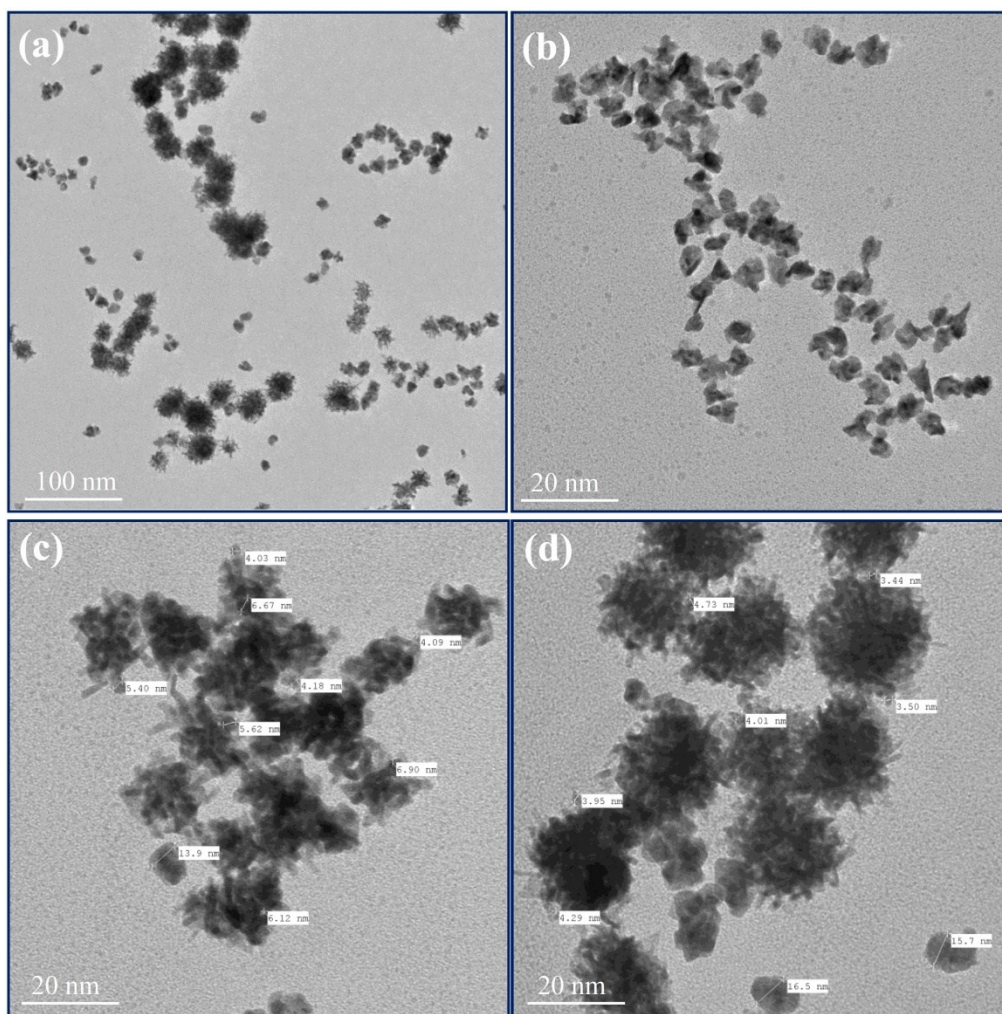

**Supplementary Fig. S1** TEM images of the fabricated ionic polymer actuator films.

## S.2 FTIR

FTIR analysis was conducted from 4000 to 400  $\text{cm}^{-1}$ , and the results of the fabricated (a) O-PPy/PVA/EL, (b) P-PPy/PVA/EL, (c) Q-PPy/PVA/EL and (d) R-PPy/PVA/EL films are shown in Supplementary Fig. S2. Peaks observed at 3400 and 2940  $\text{cm}^{-1}$ ; were assigned due to the O-H stretching mode of hydroxyl groups (-OH), and asymmetric stretching of  $-\text{CH}_2$  (Supplementary Fig. S2 (a-d)). The peaks appearing between 1000 and 1160  $\text{cm}^{-1}$  were due to C-O stretching<sup>1</sup> (Supplementary Fig. S2 (b-d)). The peaks at 3440, 2360 and 1630  $\text{cm}^{-1}$  are respectively assigned

due to -N-H and -CH stretching and N-H bending (Supplementary Fig. S2 (a-d)). The peaks appeared at 1550 and 1460  $\text{cm}^{-1}$  ascribed due to the anti-symmetric and symmetric stretching vibrations of C=C in PPy ring<sup>2</sup>. Other characteristic peaks of C-N (1306  $\text{cm}^{-1}$ ), C-C (1185  $\text{cm}^{-1}$ ), N-H (1040  $\text{cm}^{-1}$ ) and C-H (907, 780 and 675  $\text{cm}^{-1}$ ) bonds are also clearly observed<sup>3</sup>, and these results confirm the successful formation of polypyrrole nanoparticles (Supplementary Fig. S2 (a-d)). As shown in Supplementary Fig. S2 (b), the absorption bands at 1215 and 1580  $\text{cm}^{-1}$  could be assigned to the C-O stretch of the acid and C=C stretch of SWNT backbones, respectively<sup>4</sup>. The absorption peak at 1722  $\text{cm}^{-1}$  confirms the existence of the carboxylic acid groups (Supplementary Fig. S2 (b))<sup>4,5</sup>. The absorption bands at 1574 and 1378  $\text{cm}^{-1}$  suggest the formation of SWNT-COO<sup>-</sup>Na<sup>+</sup> (Supplementary Fig. S2 (a))<sup>6</sup>.

The characteristics peaks of PEDOT: PSS at 3700  $\text{cm}^{-1}$  and 1852  $\text{cm}^{-1}$  assigned due to O-H stretching and stretching frequency of C=S bond stretching mode of the sulfoxide groups (Supplementary Fig. S2 (b))<sup>7</sup>. The absorption at  $\sim 1141 \text{cm}^{-1}$  for C-O-S stretching vibration and  $\sim 1240 \text{cm}^{-1}$  for O-S-O asymmetric stretching vibration demonstrated that -SO<sub>3</sub>H was present in the membrane actuator<sup>8</sup>. By the composition of PEDOT: PSS, PVA and SWNT, the intensity of several peaks were enhanced noticeably due to symmetric and asymmetric stretching bands of S=O which generally appear at the same frequency of C-O stretching<sup>9</sup>.

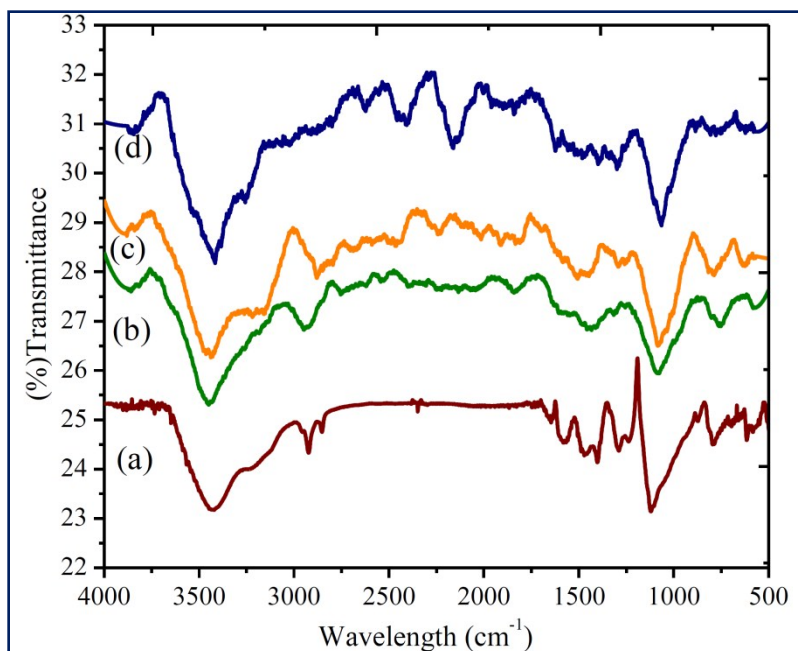

**Supplementary Fig. S2** FT-IR spectra for (a) O-PPy/PVA/EL (b) P-PPy/PVA/EL, (c) Q-PPy/PVA/EL and (d) R-PPy/PVA/EL film actuators.

### S.3 Ion exchange capacity (IEC)

The IEC of O-, P-, Q and R-PPy/PVA/EL actuator films were measured by a classical titration method. This method is used to measure the  $H^+$  ions released by neutral salts to move through the polymer film. Firstly, the dried fabricated films (0.25 g) were cutted into very small pieces and treated with 1 M  $HNO_3$  for 24 h at R.T., to change into  $H^+$  form. Then the then the polymer films were washed with double distilled water till neutralization and dried at 60 °C for 6 h. After that, the actuator films were stuffed into a glass column. Now, 1M aqueous solution of  $NaNO_3$  as eluent was utilized to elute the protons totally from the column, with the flow rate of 0.5 ml  $min^{-1}$ . Then, the exchanged proton ( $H^+$ ) of the solution was titrated with standard (0.1 M) NaOH solution using phenolphthalein indicator. Finally, the IEC was calculated using following equations:

$$\text{IEC} = \frac{\text{Concentration of NaOH} \times \text{Vol of NaOH}}{\text{Weight of dry membrane}} \dots\dots\dots (1)$$

**S.4 Ionic or proton conductivity**

Ionic or proton conductivity of the O-, P-, Q and R-PPy/PVA/EL films were measured by modular potentiostat/galvanostat (Autolab 302N) associated with an impedance analyser (FRA32M.X). A customary three-electrode framework including the O-, P-, Q and R-PPy/PVA/EL based actuator films were used as working electrode, Ag/AgCl as reference and a platinum wire counter electrode were utilized for PC investigation. The deliberate procedure was completed over a frequency range of 100 KHz under an AC annoyance of 100 mV. The proton conductivity ( $\sigma$ ) of the O-, P-, Q and R-PPy/PVA/EL films were calculated using the following equation:

$$\sigma = \frac{L}{R \times A} \dots\dots\dots 2$$

where  $\sigma$  stands for proton conductivity ( $\text{S cm}^{-1}$ ), L for the thickness of the membrane (cm), R is the resistance ( $\Omega$ ), and A for cross-sectional area of the membrane ( $\text{cm}^2$ ).

**S.5 Voltage vs. tip generated force behavior**

The tip generated force behavior for fabricated actuator films was also confirmed that the tip force was also proportional to the applied voltages like the tip displacement. The tip displacement and tip generated force both were found to be increasing with the increase of applied voltage (Supplementary Fig. S6). Therefore, large tip displacement reflects the larger generated force through the tip of the ionic polymer membrane. Thus, the results suggested that due to higher tip displacement of O-PPy/PVA/EL based actuator film, the generated force was also higher than the P-PPy/PVA/EL, Q-PPy/PVA/EL and R-PPy/PVA/EL actuator films.

## Supplementary Figures

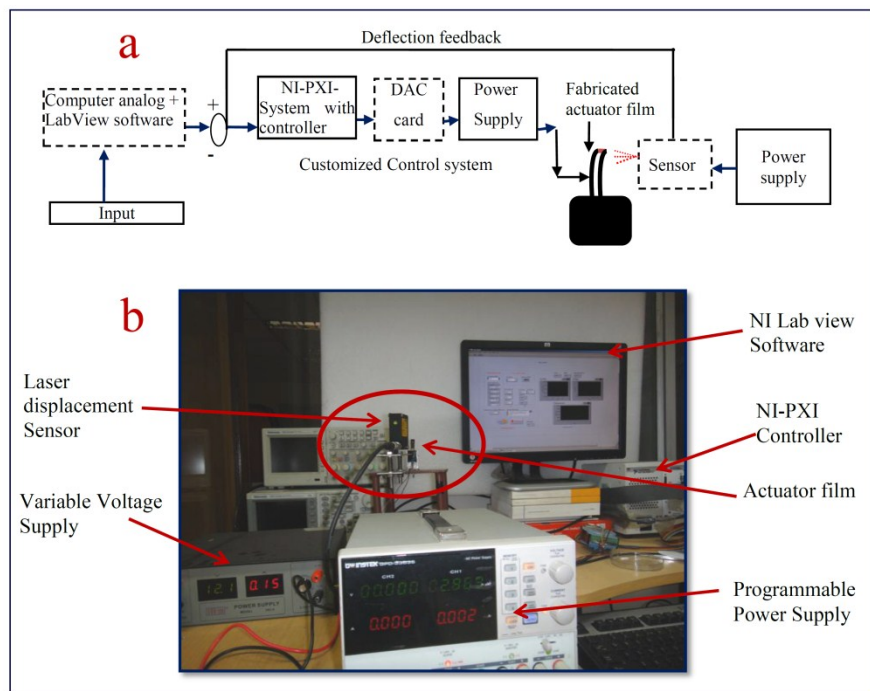

**Supplementary Fig. S3** (a) Schematic representation and (b) actual view of experimental testing setup to analyse the tip displacement of the fabricated actuator films.

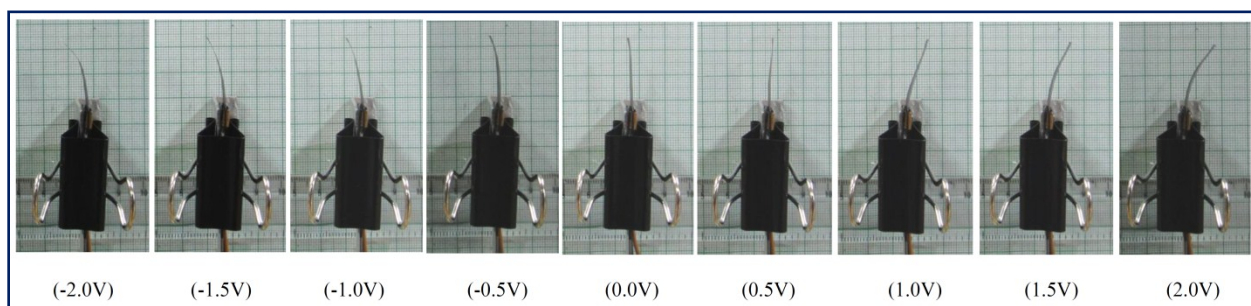

**Supplementary Fig. S4** Successive tip deflection behavior of O-PPy/PVA/EL based actuator film.

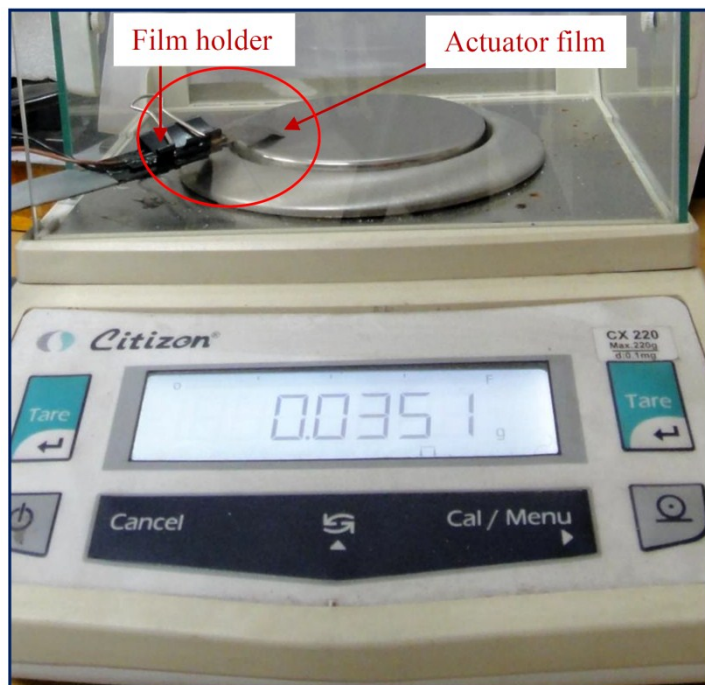

**Supplementary Fig. S5** Load characterization testing setup for the fabricated PPy/PVA/EL based actuator film.

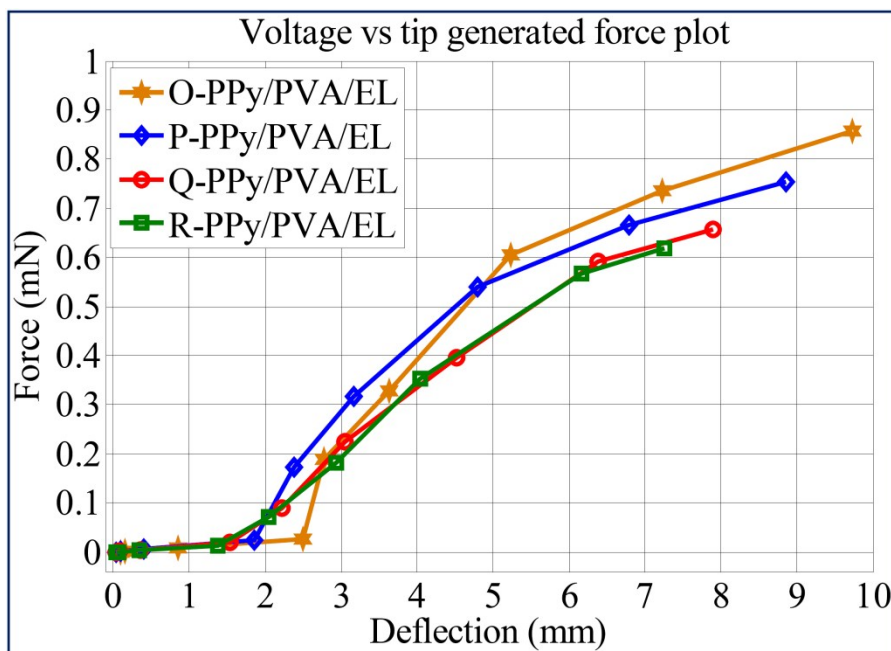

**Supplementary Fig. S6** Force vs. deflection behavior for (a) O-PPy/PVA/EL, (b) P-PPy/PVA/EL, (c) Q-PPy/PVA/EL and (d) R-PPy/PVA/EL based actuator films.

## Supplementary Tables

**Supplementary Table S1** In-situ oxidative polymerization of PPy for the fabrication of actuator films with various diameters.

| Composite Samples | Each composition in 10 mL DMW at 70 °C |               |           |                           |
|-------------------|----------------------------------------|---------------|-----------|---------------------------|
|                   | PVA (g)                                | Pyrrrole (mL) | FeCl3 (g) | Remarks                   |
| O-PPy/PVA         | 1.0                                    | 1.0           | 0.25      | smooth film, cavity free  |
| P-PPy/PVA         | 1.0                                    | 1.0           | 0.50      | smooth film, small cavity |
| Q-PPy/PVA         | 1.0                                    | 1.0           | 0.75      | porous film               |
| R-PPy/PVA         | 1.0                                    | 1.0           | 1.0       | porous film               |

**Supplementary Table S2** Tensile properties of (a) O-PPy/PVA/EL, (b) P-PPy/PVA/EL, (c) Q-PPy/PVA/EL and (d) R-PPy/PVA/EL based actuator films.

| Fabricated actuator films | Young's modulus (MPa) | Ultimate tensile strength (MPa) | Elongation at break (%) |
|---------------------------|-----------------------|---------------------------------|-------------------------|
| O-PPy/PVA/EL              | 568.41                | 37.72                           | 6.93                    |
| P-PPy/PVA/EL              | 529.19                | 36.19                           | 7.95                    |
| Q-PPy/PVA/EL              | 440.97                | 34.14                           | 8.98                    |
| R-PPy/PVA/EL              | 386.37                | 32.08                           | 9.77                    |

**Supplementary Table S3** Experimental deflection data of O-PPy/PVA/EL ionic polymer actuator for trial 1.

| Deflection (mm) | Voltage (V) |       |       |       |       |       |       |       |       |
|-----------------|-------------|-------|-------|-------|-------|-------|-------|-------|-------|
|                 | 0.0V        | 0.25V | 0.50V | 0.75V | 1.00V | 1.25V | 1.50V | 1.75V | 2.00V |
| d1              | 0.08        | 0.150 | 0.867 | 2.424 | 2.985 | 3.658 | 5.234 | 7.112 | 9.564 |
| d2              | 0.07        | 0.143 | 0.958 | 2.654 | 2.895 | 3.568 | 5.421 | 7.245 | 9.664 |
| d3              | 0.08        | 0.154 | 0.657 | 2.684 | 2.365 | 3.658 | 5.124 | 7.324 | 9.795 |
| d4              | 0.12        | 0.196 | 0.856 | 2.465 | 2.647 | 3.687 | 5.145 | 7.124 | 9.695 |
| d5              | 0.10        | 0.168 | 0.954 | 2.365 | 2.867 | 3.657 | 5.312 | 7.321 | 9.821 |
| d6              | 0.09        | 0.156 | 0.784 | 2.354 | 2.876 | 3.568 | 5.134 | 7.234 | 9.853 |

**Supplementary Table S4** Experimental deflection data of O-PPy/PVA/EL ionic polymer actuator for trial 2.



| Deflection<br>(mm) | Voltage (V) |       |       |       |       |       |       |       |       |
|--------------------|-------------|-------|-------|-------|-------|-------|-------|-------|-------|
|                    | 0.0V        | 0.25V | 0.50V | 0.75V | 1.00V | 1.25V | 1.50V | 1.75V | 2.00V |
| d1                 | 0.083       | 0.338 | 1.461 | 5.907 | 3.964 | 7.344 | 6.742 | 7.130 | 9.609 |
| d2                 | 0.631       | 0.722 | 1.513 | 5.194 | 3.398 | 7.426 | 5.875 | 7.270 | 9.731 |
| d3                 | 0.672       | 0.466 | 4.207 | 4.117 | 3.116 | 5.662 | 8.310 | 7.505 | 9.953 |
| d4                 | 0.749       | 0.855 | 3.223 | 4.561 | 3.627 | 5.685 | 6.736 | 7.307 | 9.698 |
| d5                 | 0.161       | 0.299 | 3.199 | 4.006 | 4.571 | 5.036 | 6.299 | 7.431 | 9.829 |
| d6                 | 0.379       | 0.347 | 1.376 | 2.664 | 3.078 | 7.244 | 6.783 | 7.245 | 9.885 |

**Supplementary Table S5** Experimental deflection data of O-PPy/PVA/EL ionic polymer actuator for trial 3.

| Deflection<br>(mm) | Voltage (V) |       |       |       |       |       |       |       |       |
|--------------------|-------------|-------|-------|-------|-------|-------|-------|-------|-------|
|                    | 0.0V        | 0.25V | 0.50V | 0.75V | 1.00V | 1.25V | 1.50V | 1.75V | 2.00V |
| d1                 | 0.275       | 0.387 | 0.984 | 4.267 | 5.491 | 7.213 | 7.964 | 7.204 | 9.587 |
| d2                 | 0.518       | 0.458 | 4.689 | 6.522 | 5.623 | 7.236 | 5.969 | 7.330 | 9.667 |
| d3                 | 0.608       | 0.531 | 3.590 | 4.880 | 3.953 | 6.856 | 8.021 | 7.431 | 9.883 |
| d4                 | 0.284       | 0.259 | 2.818 | 4.558 | 4.123 | 4.083 | 5.573 | 7.230 | 9.754 |
| d5                 | 0.187       | 0.363 | 3.277 | 3.295 | 6.835 | 4.708 | 7.938 | 7.361 | 9.878 |
| d6                 | 0.310       | 0.751 | 1.737 | 4.317 | 3.027 | 4.915 | 7.119 | 7.317 | 9.960 |

**Supplementary Table S6** Experimental deflection data of O-PPy/PVA/EL ionic polymer actuator for trial 4.

| Deflection<br>(mm) | Voltage (V) |       |       |       |       |       |       |       |       |
|--------------------|-------------|-------|-------|-------|-------|-------|-------|-------|-------|
|                    | 0.0V        | 0.25V | 0.50V | 0.75V | 1.00V | 1.25V | 1.50V | 1.75V | 2.00V |
| d1                 | 0.434       | 0.520 | 3.513 | 4.159 | 6.321 | 6.293 | 5.904 | 7.247 | 9.642 |
| d2                 | 0.404       | 0.211 | 3.038 | 5.965 | 6.118 | 6.087 | 5.847 | 7.376 | 9.798 |
| d3                 | 0.122       | 0.734 | 4.561 | 3.018 | 2.607 | 4.829 | 6.618 | 7.331 | 9.854 |
| d4                 | 0.603       | 0.775 | 3.460 | 2.999 | 4.249 | 5.419 | 5.940 | 7.229 | 9.835 |
| d5                 | 0.130       | 0.680 | 4.165 | 3.060 | 4.981 | 3.719 | 7.276 | 7.359 | 9.864 |
| d6                 | 0.141       | 0.262 | 2.604 | 3.922 | 4.548 | 7.516 | 6.496 | 7.294 | 9.952 |

**Supplementary Table S7** Experimental deflection data of P-PPy/PVA/EL ionic polymer actuator for trial 1.

| Deflection<br>(mm) | Voltage (V) |       |       |       |       |       |       |       |       |
|--------------------|-------------|-------|-------|-------|-------|-------|-------|-------|-------|
|                    | 0.0V        | 0.25V | 0.50V | 0.75V | 1.00V | 1.25V | 1.50V | 1.75V | 2.00V |
| d1                 | 0.04        | 0.098 | 0.465 | 1.852 | 2.345 | 3.125 | 4.734 | 6.856 | 8.854 |
| d2                 | 0.05        | 0.095 | 0.356 | 1.735 | 2.468 | 3.135 | 4.832 | 6.756 | 8.954 |
| d3                 | 0.03        | 0.096 | 0.354 | 1.625 | 2.365 | 3.136 | 4.651 | 6.645 | 8.865 |
| d4                 | 0.06        | 0.089 | 0.354 | 1.985 | 2.352 | 3.232 | 4.822 | 6.865 | 8.756 |
| d5                 | 0.02        | 0.095 | 0.395 | 1.956 | 2.421 | 3.235 | 4.885 | 6.765 | 8.865 |
| d6                 | 0.04        | 0.098 | 0.452 | 1.986 | 2.352 | 3.135 | 4.885 | 6.864 | 8.894 |

**Supplementary Table S8** Experimental deflection data of P-PPy/PVA/EL ionic polymer actuator for trial 2.

| Deflection (mm) | Voltage (V) |       |       |       |       |       |       |       |       |
|-----------------|-------------|-------|-------|-------|-------|-------|-------|-------|-------|
|                 | 0.0V        | 0.25V | 0.50V | 0.75V | 1.00V | 1.25V | 1.50V | 1.75V | 2.00V |
| d1              | 0.555       | 0.569 | 2.948 | 4.202 | 4.737 | 4.827 | 7.303 | 6.925 | 8.872 |
| d2              | 0.350       | 0.275 | 1.423 | 2.168 | 2.558 | 3.514 | 4.967 | 6.896 | 9.058 |
| d3              | 0.182       | 0.403 | 3.671 | 5.272 | 4.076 | 5.544 | 4.927 | 6.767 | 8.998 |
| d4              | 0.402       | 0.555 | 4.308 | 5.525 | 3.610 | 5.127 | 6.108 | 7.030 | 8.828 |
| d5              | 0.405       | 0.296 | 3.334 | 5.247 | 3.070 | 6.036 | 7.021 | 6.855 | 8.880 |
| d6              | 0.136       | 0.330 | 1.836 | 3.035 | 3.071 | 5.951 | 7.519 | 6.919 | 8.939 |

**Supplementary Table S9** Experimental deflection data of P-PPy/PVA/EL ionic polymer actuator for trial 3.

| Deflection (mm) | Voltage (V) |       |       |       |       |       |       |       |       |
|-----------------|-------------|-------|-------|-------|-------|-------|-------|-------|-------|
|                 | 0.0V        | 0.25V | 0.50V | 0.75V | 1.00V | 1.25V | 1.50V | 1.75V | 2.00V |
| d1              | 0.479       | 0.585 | 2.068 | 4.239 | 5.147 | 4.927 | 8.081 | 6.979 | 8.904 |
| d2              | 0.590       | 0.160 | 3.091 | 2.803 | 3.931 | 3.214 | 6.583 | 6.871 | 9.056 |
| d3              | 0.683       | 0.463 | 3.374 | 1.806 | 5.365 | 4.484 | 8.267 | 6.702 | 8.932 |
| d4              | 0.741       | 0.460 | 2.472 | 5.060 | 3.960 | 4.960 | 6.415 | 6.898 | 8.883 |
| d5              | 0.154       | 0.698 | 1.811 | 2.945 | 5.205 | 4.336 | 8.018 | 6.885 | 8.982 |
| d6              | 0.137       | 0.437 | 1.063 | 3.788 | 5.220 | 3.937 | 6.501 | 7.009 | 8.919 |

**Supplementary Table S10** Experimental deflection data of P-PPy/PVA/EL ionic polymer actuator for trial 4.

| Deflection (mm) | Voltage (V) |       |       |       |       |       |       |       |       |
|-----------------|-------------|-------|-------|-------|-------|-------|-------|-------|-------|
|                 | 0.0V        | 0.25V | 0.50V | 0.75V | 1.00V | 1.25V | 1.50V | 1.75V | 2.00V |
| d1              | 0.525       | 0.492 | 1.465 | 5.463 | 2.413 | 5.364 | 6.719 | 6.863 | 8.946 |
| d2              | 0.833       | 0.808 | 3.058 | 5.717 | 2.958 | 5.688 | 5.612 | 6.865 | 9.031 |
| d3              | 0.447       | 0.551 | 0.692 | 4.743 | 5.862 | 3.265 | 5.105 | 6.693 | 8.886 |
| d4              | 0.439       | 0.758 | 2.892 | 4.342 | 4.315 | 5.724 | 5.655 | 6.958 | 8.840 |
| d5              | 0.654       | 0.679 | 3.074 | 5.719 | 5.846 | 4.704 | 5.479 | 6.885 | 9.012 |
| d6              | 0.220       | 0.562 | 3.410 | 4.338 | 3.201 | 3.335 | 5.651 | 6.950 | 9.045 |

**Supplementary Table S11** Experimental deflection data of Q-PPy/PVA/EL ionic polymer actuator for trial 1.

| Deflection (mm) | Voltage (V) |       |       |       |       |       |       |       |       |
|-----------------|-------------|-------|-------|-------|-------|-------|-------|-------|-------|
|                 | 0.0V        | 0.25V | 0.50V | 0.75V | 1.00V | 1.25V | 1.50V | 1.75V | 2.00V |
| d1              | 0.05        | 0.086 | 0.435 | 1.657 | 2.432 | 3.024 | 4.564 | 6.546 | 7.824 |
| d2              | 0.03        | 0.065 | 0.312 | 1.564 | 2.214 | 3.045 | 4.765 | 6.354 | 7.954 |
| d3              | 0.04        | 0.075 | 0.332 | 1.457 | 2.246 | 3.043 | 4.324 | 6.235 | 7.836 |
| d4              | 0.05        | 0.086 | 0.341 | 1.468 | 2.134 | 3.056 | 4.365 | 6.236 | 7.938 |
| d5              | 0.04        | 0.075 | 0.361 | 1.467 | 2.135 | 3.074 | 4.465 | 6.452 | 7.868 |
| d6              | 0.05        | 0.082 | 0.365 | 1.642 | 2.124 | 3.086 | 4.654 | 6.436 | 7.989 |

**Supplementary Table S12** Experimental deflection data of Q-PPy/PVA/EL ionic polymer actuator for trial 2.

| Deflection (mm) | Voltage (V) |       |       |       |       |       |       |       |       |
|-----------------|-------------|-------|-------|-------|-------|-------|-------|-------|-------|
|                 | 0.0V        | 0.25V | 0.50V | 0.75V | 1.00V | 1.25V | 1.50V | 1.75V | 2.00V |
| d1              | 0.053       | 0.274 | 1.029 | 5.140 | 3.411 | 6.710 | 6.072 | 6.564 | 7.869 |
| d2              | 0.591       | 0.644 | 0.867 | 4.104 | 2.717 | 6.903 | 5.219 | 6.379 | 8.021 |
| d3              | 0.632       | 0.387 | 3.882 | 2.890 | 2.997 | 5.047 | 7.510 | 6.416 | 7.994 |
| d4              | 0.679       | 0.745 | 2.708 | 3.564 | 3.114 | 5.054 | 5.956 | 6.419 | 7.941 |
| d5              | 0.101       | 0.206 | 2.606 | 3.108 | 3.839 | 4.453 | 5.452 | 6.562 | 7.876 |
| d6              | 0.339       | 0.273 | 0.957 | 1.952 | 2.326 | 6.762 | 6.303 | 6.447 | 8.021 |

**Supplementary Table S13** Experimental deflection data of Q-PPy/PVA/EL ionic polymer actuator for trial 3.

| Deflection (mm) | Voltage (V) |       |       |       |       |       |       |       |       |
|-----------------|-------------|-------|-------|-------|-------|-------|-------|-------|-------|
|                 | 0.0V        | 0.25V | 0.50V | 0.75V | 1.00V | 1.25V | 1.50V | 1.75V | 2.00V |
| d1              | 0.245       | 0.323 | 0.552 | 3.500 | 4.938 | 6.579 | 7.294 | 6.638 | 7.847 |
| d2              | 0.478       | 0.380 | 4.043 | 5.432 | 4.942 | 6.713 | 5.313 | 6.439 | 7.957 |
| d3              | 0.568       | 0.452 | 3.265 | 3.653 | 3.834 | 6.241 | 7.221 | 6.342 | 7.924 |
| d4              | 0.214       | 0.149 | 2.303 | 3.561 | 3.61  | 3.452 | 4.793 | 6.342 | 7.997 |
| d5              | 0.127       | 0.270 | 2.684 | 2.397 | 6.103 | 4.125 | 7.091 | 6.491 | 7.925 |
| d6              | 0.270       | 0.677 | 1.318 | 3.605 | 2.275 | 4.433 | 6.639 | 6.519 | 8.096 |

**Supplementary Table S14** Experimental deflection data of Q-PPy/PVA/EL ionic polymer actuator for trial 4.

| Deflection (mm) | Voltage (V) |       |       |       |       |       |       |       |       |
|-----------------|-------------|-------|-------|-------|-------|-------|-------|-------|-------|
|                 | 0.0V        | 0.25V | 0.50V | 0.75V | 1.00V | 1.25V | 1.50V | 1.75V | 2.00V |
| d1              | 0.404       | 0.456 | 3.081 | 3.392 | 5.768 | 5.659 | 5.234 | 6.681 | 7.902 |
| d2              | 0.364       | 0.133 | 2.392 | 4.875 | 5.437 | 5.564 | 5.191 | 6.485 | 8.088 |
| d3              | 0.082       | 0.655 | 4.236 | 1.791 | 2.488 | 4.214 | 5.818 | 6.242 | 7.895 |
| d4              | 0.533       | 0.665 | 2.945 | 2.002 | 3.736 | 4.788 | 5.160 | 6.341 | 8.078 |
| d5              | 0.070       | 0.587 | 3.572 | 2.162 | 4.249 | 3.136 | 6.429 | 6.490 | 7.911 |
| d6              | 0.100       | 0.188 | 2.185 | 3.210 | 3.796 | 7.034 | 6.016 | 6.496 | 8.088 |

**Supplementary Table S15** Experimental deflection data of R-PPy/PVA/EL ionic polymer actuator for trial 1.

| Deflection (mm) | Voltage (V) |       |       |       |       |       |       |       |       |
|-----------------|-------------|-------|-------|-------|-------|-------|-------|-------|-------|
|                 | 0.0V        | 0.25V | 0.50V | 0.75V | 1.00V | 1.25V | 1.50V | 1.75V | 2.00V |
| d1              | 0.02        | 0.085 | 0.385 | 1.452 | 2.124 | 2.985 | 4.023 | 6.124 | 7.191 |
| d2              | 0.04        | 0.061 | 0.411 | 1.465 | 2.021 | 2.956 | 4.058 | 6.138 | 7.341 |
| d3              | 0.05        | 0.064 | 0.321 | 1.421 | 2.042 | 2.864 | 4.035 | 6.165 | 7.262 |
| d4              | 0.05        | 0.067 | 0.312 | 1.341 | 2.042 | 2.887 | 4.064 | 6.182 | 7.284 |
| d5              | 0.06        | 0.081 | 0.361 | 1.312 | 2.008 | 2.984 | 4.032 | 6.175 | 7.265 |
| d6              | 0.04        | 0.061 | 0.321 | 1.314 | 2.038 | 2.968 | 4.056 | 6.168 | 7.235 |

**Supplementary Table S16** Experimental deflection data of R-PPy/PVA/EL ionic polymer actuator for trial 2.

| Deflection (mm) | Voltage (V) |       |       |       |       |       |       |       |       |
|-----------------|-------------|-------|-------|-------|-------|-------|-------|-------|-------|
|                 | 0.0V        | 0.25V | 0.50V | 0.75V | 1.00V | 1.25V | 1.50V | 1.75V | 2.00V |
| d1              | 0.023       | 0.273 | 0.979 | 4.935 | 3.103 | 6.671 | 5.531 | 6.142 | 7.236 |
| d2              | 0.601       | 0.640 | 0.966 | 4.005 | 2.524 | 6.814 | 4.512 | 6.163 | 7.408 |
| d3              | 0.642       | 0.376 | 3.871 | 2.854 | 2.793 | 4.868 | 7.221 | 6.346 | 7.42  |
| d4              | 0.679       | 0.726 | 2.679 | 3.437 | 3.022 | 4.885 | 5.655 | 6.365 | 7.287 |
| d5              | 0.121       | 0.212 | 2.606 | 2.953 | 3.712 | 4.363 | 5.019 | 6.285 | 7.273 |
| d6              | 0.329       | 0.252 | 0.913 | 1.624 | 2.240 | 6.644 | 5.705 | 6.179 | 7.267 |

**Supplementary Table S17** Experimental deflection data of R-PPy/PVA/EL ionic polymer actuator for trial 3.

| Deflection (mm) | Voltage (V) |       |       |       |       |       |       |       |       |
|-----------------|-------------|-------|-------|-------|-------|-------|-------|-------|-------|
|                 | 0.0V        | 0.25V | 0.50V | 0.75V | 1.00V | 1.25V | 1.50V | 1.75V | 2.00V |
| d1              | 0.215       | 0.322 | 0.502 | 3.295 | 4.630 | 6.540 | 6.753 | 6.216 | 7.214 |
| d2              | 0.488       | 0.376 | 4.142 | 5.333 | 4.749 | 6.624 | 4.606 | 6.223 | 7.344 |
| d3              | 0.578       | 0.441 | 3.254 | 3.617 | 3.630 | 6.062 | 6.932 | 6.272 | 7.350 |
| d4              | 0.214       | 0.130 | 2.274 | 3.434 | 3.518 | 3.283 | 4.492 | 6.288 | 7.343 |
| d5              | 0.147       | 0.276 | 2.684 | 2.242 | 5.976 | 4.035 | 6.658 | 6.214 | 7.322 |
| d6              | 0.260       | 0.656 | 1.274 | 3.277 | 2.189 | 4.315 | 6.041 | 6.251 | 7.342 |

**Supplementary Table S18** Experimental deflection data of R-PPy/PVA/EL ionic polymer actuator for trial 4.

| Deflection (mm) | Voltage (V) |       |       |       |       |       |       |       |       |
|-----------------|-------------|-------|-------|-------|-------|-------|-------|-------|-------|
|                 | 0.0V        | 0.25V | 0.50V | 0.75V | 1.00V | 1.25V | 1.50V | 1.75V | 2.00V |
| d1              | 0.374       | 0.455 | 3.031 | 3.187 | 5.460 | 5.620 | 4.693 | 6.259 | 7.269 |
| d2              | 0.374       | 0.129 | 2.491 | 4.776 | 5.244 | 5.475 | 4.484 | 6.269 | 7.475 |
| d3              | 0.092       | 0.644 | 4.225 | 1.755 | 2.284 | 4.035 | 5.529 | 6.172 | 7.321 |
| d4              | 0.533       | 0.646 | 2.916 | 1.875 | 3.644 | 4.619 | 4.859 | 6.287 | 7.424 |
| d5              | 0.090       | 0.593 | 3.572 | 2.007 | 4.122 | 3.046 | 5.996 | 6.213 | 7.308 |
| d6              | 0.090       | 0.167 | 2.141 | 2.882 | 3.710 | 6.916 | 5.418 | 6.228 | 7.334 |

**Supplementary Table S19** Calculated tip generated force data for O-PPy/PVA/EL ionic polymer film actuator.

| Force (mN) | Voltage (V) |        |        |        |        |        |        |        |        |
|------------|-------------|--------|--------|--------|--------|--------|--------|--------|--------|
|            | 0 V         | 0.25   | 0.50   | 0.75V  | 1.00   | 1.25V  | 1.5V   | 1.75V  | 2.0V   |
| F1         | 0           | 0.0012 | 0.0065 | 0.0214 | 0.1352 | 0.3245 | 0.5124 | 0.7846 | 0.8695 |
| F2         | 0           | 0.0013 | 0.0075 | 0.0234 | 0.1542 | 0.2315 | 0.6524 | 0.7458 | 0.8554 |
| F3         | 0           | 0.0010 | 0.0068 | 0.0310 | 0.2103 | 0.3415 | 0.5628 | 0.7628 | 0.8695 |
| F4         | 0           | 0.0015 | 0.0095 | 0.0321 | 0.2151 | 0.3524 | 0.6514 | 0.7451 | 0.8597 |
| F5         | 0           | 0.0023 | 0.0082 | 0.0216 | 0.1985 | 0.3954 | 0.6524 | 0.6754 | 0.7985 |

|    |   |        |        |        |        |        |        |                    |           |
|----|---|--------|--------|--------|--------|--------|--------|--------------------|-----------|
| F6 | 0 | 0.0024 | 0.0067 | 0.0268 | 0.2121 | 0.3214 | 0.5986 | 0.6985             | 0.8865    |
|    |   |        |        |        |        |        |        | Operating voltage  | 2.0 V     |
|    |   |        |        |        |        |        |        | Mean               | 0.8565    |
|    |   |        |        |        |        |        |        | Standard deviation | 0.0303 mN |

**Supplementary Table S20** Calculated tip generated force data for P-PPy/PVA/EL ionic polymer film actuator.

| Force (mN) | Voltage (V) |        |        |        |        |        |        |                    |           |
|------------|-------------|--------|--------|--------|--------|--------|--------|--------------------|-----------|
|            | 0 V         | 0.25   | 0.50   | 0.75V  | 1.00   | 1.25V  | 1.5V   | 1.75V              | 2.0V      |
| F1         | 0           | 0.0008 | 0.0052 | 0.0211 | 0.1265 | 0.3168 | 0.4954 | 0.7021             | 0.7986    |
| F2         | 0           | 0.0010 | 0.0065 | 0.0216 | 0.1365 | 0.3134 | 0.5102 | 0.6897             | 0.8031    |
| F3         | 0           | 0.0008 | 0.0049 | 0.0264 | 0.1985 | 0.3245 | 0.5874 | 0.7105             | 0.7402    |
| F4         | 0           | 0.0011 | 0.0065 | 0.0254 | 0.1895 | 0.3314 | 0.5985 | 0.6895             | 0.7291    |
| F5         | 0           | 0.0013 | 0.0071 | 0.0221 | 0.1867 | 0.3104 | 0.5357 | 0.5986             | 0.7184    |
| F6         | 0           | 0.0016 | 0.0062 | 0.0251 | 0.1987 | 0.3025 | 0.5124 | 0.6058             | 0.7362    |
|            |             |        |        |        |        |        |        | Operating voltage  | 2.0 V     |
|            |             |        |        |        |        |        |        | Mean               | 0.7542    |
|            |             |        |        |        |        |        |        | Standard deviation | 0.0368 mN |

**Supplementary Table S21** Calculated tip generated force data for Q-PPy/PVA/EL ionic polymer membrane actuator.

| Force (mN) | Voltage (V) |        |        |        |        |        |        |                    |           |
|------------|-------------|--------|--------|--------|--------|--------|--------|--------------------|-----------|
|            | 0 V         | 0.25   | 0.50   | 0.75V  | 1.00   | 1.25V  | 1.5V   | 1.75V              | 2.0V      |
| F1         | 0           | 0.0004 | 0.0041 | 0.0186 | 0.0896 | 0.2485 | 0.3678 | 0.6127             | 0.6157    |
| F2         | 0           | 0.0007 | 0.0042 | 0.0184 | 0.0958 | 0.2157 | 0.4312 | 0.5968             | 0.6589    |
| F3         | 0           | 0.0010 | 0.0039 | 0.0195 | 0.0865 | 0.2035 | 0.3985 | 0.5647             | 0.6984    |
| F4         | 0           | 0.0006 | 0.0051 | 0.0187 | 0.0798 | 0.2087 | 0.3895 | 0.5684             | 0.7023    |
| F5         | 0           | 0.0010 | 0.0058 | 0.0179 | 0.0957 | 0.2114 | 0.4215 | 0.6101             | 0.6412    |
| F6         | 0           | 0.0009 | 0.0054 | 0.0194 | 0.0934 | 0.2647 | 0.3689 | 0.5897             | 0.6214    |
|            |             |        |        |        |        |        |        | Operating voltage  | 2.0 V     |
|            |             |        |        |        |        |        |        | Mean               | 0.6563    |
|            |             |        |        |        |        |        |        | Standard deviation | 0.0373 mN |

**Supplementary Table S22** Calculated tip generated force data for R-PPy/PVA/EL ionic polymer film actuator.

| Force (mN) | Voltage (V) |        |        |        |        |        |        |        |        |
|------------|-------------|--------|--------|--------|--------|--------|--------|--------|--------|
|            | 0 V         | 0.25   | 0.50   | 0.75V  | 1.00   | 1.25V  | 1.5V   | 1.75V  | 2.0V   |
| F1         | 0           | 0.0005 | 0.0031 | 0.0125 | 0.0845 | 0.1986 | 0.3841 | 0.5486 | 0.5831 |
| F2         | 0           | 0.0002 | 0.0038 | 0.0165 | 0.0761 | 0.1957 | 0.3854 | 0.5112 | 0.5767 |
| F3         | 0           | 0.0004 | 0.0028 | 0.0121 | 0.0714 | 0.1864 | 0.3025 | 0.5864 | 0.6241 |
| F4         | 0           | 0.0002 | 0.0043 | 0.0109 | 0.0689 | 0.1457 | 0.3695 | 0.6114 | 0.6741 |
| F5         | 0           | 0.0005 | 0.0034 | 0.0135 | 0.0642 | 0.1684 | 0.3785 | 0.5762 | 0.6054 |

|    |   |        |        |        |        |        |        |        |                    |           |
|----|---|--------|--------|--------|--------|--------|--------|--------|--------------------|-----------|
| F6 | 0 | 0.0002 | 0.0042 | 0.0164 | 0.0674 | 0.2013 | 0.2989 | 0.5691 | 0.6414             |           |
|    |   |        |        |        |        |        |        |        | Operating voltage  | 2.0 V     |
|    |   |        |        |        |        |        |        |        | Mean               | 0.6174    |
|    |   |        |        |        |        |        |        |        | Standard deviation | 0.0369 mN |

## References

- 1 M. Y. Kariduraganavar, S. S. Kulkarni and A. A. Kittur, *J. Memb. Sci.*, 2005, **246**, 83–93.
- 2 Y. Jia, P. Xiao, H. He, J. Yao, F. Liu, Z. Wang and Y. Li, *Appl. Surf. Sci.*, 2012, **258**, 6627–6631.
- 3 X. Zhang, J. Wang, J. Liu, J. Wu, H. Chen and H. Bi, *Carbon N. Y.*, 2017, **115**, 134–146.
- 4 L. Liu, Y. Qin, Z.-X. Guo and D. Zhu, *Carbon N. Y.*, 2003, **41**, 331–335.
- 5 J. Zhang, H. Zou, Q. Qing, Y. Yang, Q. Li, Z. Liu, X. Guo and Z. Du, *J. Phys. Chem. B*, 2003, **107**, 3712–3718.
- 6 M. A. Hamon, J. Chen, H. Hu, Y. Chen, M. E. Itkis, A. M. Rao, P. C. Eklund and R. C. Haddon, *Adv. Mater.*, 1999, **11**, 834–840.
- 7 A. Pasha, A. S. Roy, M. V. Murugendrappa, O. A. Al-Hartomy and S. Khasim, *J. Mater. Sci. Mater. Electron.*, 2016, **27**, 8332–8339.
- 8 T. Yang, *J. Memb. Sci.*, 2009, **342**, 221–226.
- 9 C. Chanthad and J. Wootthikanokkhan, *J. Appl. Polym. Sci.*, 2006, **101**, 1931–1936.
